# Supplementary material for: One-pot synthesis of end-functionalised soluble star-shaped polymers by living ring-opening metathesis polymerisation using a molybdenum-alkylidene catalyst
Source: Royal Society of Chemistry journal article supplement (doi:10.1039/c8ra05229h), 2018-01-01
Supplement: c8ra05229h1.pdf [file c8ra05229h1.pdf]

## Electronic Supplementary Information (ESI)

for

One-Pot Synthesis of End-Functionalised Soluble Star-Shaped Polymers by Living  
Ring-Opening Metathesis Polymerisation Using Molybdenum-Alkylidene Catalyst

Zelin Sun, and Kotohiro Nomura\*

*Department of Chemistry, Faculty of Science, Tokyo Metropolitan University, 1-1  
Minami Osawa, Hachioji, Tokyo 192-0397, Japan*

### Contents

Selected NMR spectra for the resultant polymers.

**Selected NMR spectra for the resultant polymers.**

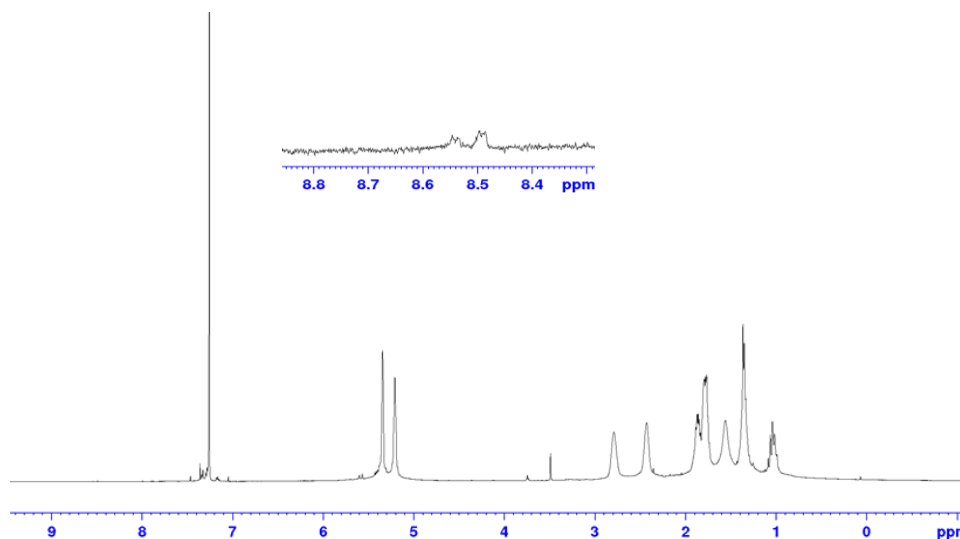

**Figure S1.**  $^1\text{H}$  NMR spectrum (in  $\text{CDCl}_3$  at  $25\text{ }^\circ\text{C}$ ) of star-shaped polymer (Table 1, run 12).

$^1\text{H}$  NMR (in  $\text{CDCl}_3$  at  $25\text{ }^\circ\text{C}$ ):  $\delta$  5.35 and 5.21 (br.s, 2H olefinic), 2.79 and 2.43 (br.s, 2H), 1.85 and 1.03 (m, 2H), 1.78 and 1.36 (m, 4H) ppm. Moreover, resonances ascribed to pyridine end group [8.54 and 8.50 (d) ppm] were also observed.

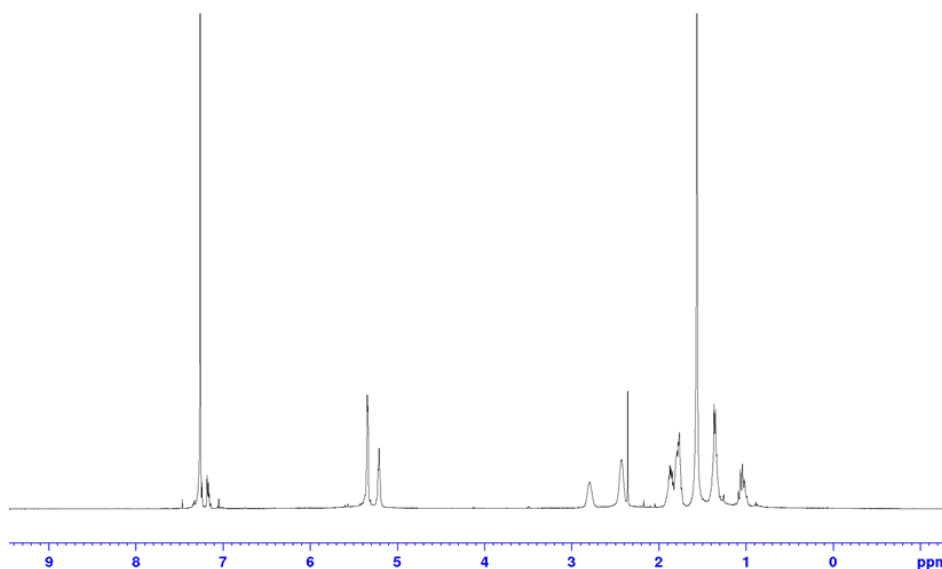

**Figure S2.**  $^1\text{H}$  NMR spectrum (in  $\text{CDCl}_3$  at  $25\text{ }^\circ\text{C}$ ) of star-shaped polymer (Table 1, run 23).

$^1\text{H}$  NMR (in  $\text{CDCl}_3$  at  $25\text{ }^\circ\text{C}$ ):  $\delta$  5.35 and 5.21 (br.s, 2H olefinic), 2.79 and 2.43 (br.s, 2H), 1.85 and 1.03 (m, 2H), 1.78 and 1.36 (m, 4H) ppm. Moreover, resonances ascribed to thiophene end group [7.00-7.40] were also observed.

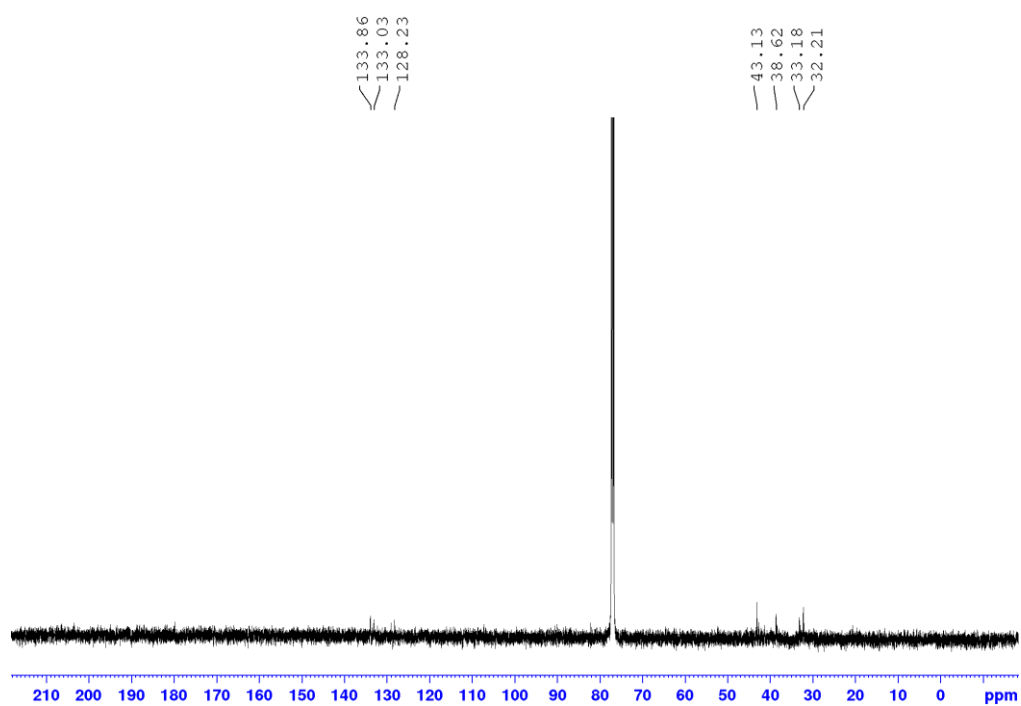

**Figure S3.**  $^{13}\text{C}$  NMR spectrum (in  $\text{CDCl}_3$  at  $25\text{ }^\circ\text{C}$ ) of star-shaped polymer (Table 1, run 12).

$^{13}\text{C}$  NMR (in  $\text{CDCl}_3$  at  $25\text{ }^\circ\text{C}$ ):  $\delta$  133.9, 133.0, 128.2, 43.1, 38.6, 33.2, 32.2 ppm.
